# Supplementary material for: Pharmacological reversion of sphingomyelin-induced dendritic spine anomalies in a Niemann Pick disease type A mouse model
Source: PubMed Central journal article supplement (PMC3958313; doi:10.1002/emmm.201302649), 2014-01-21
Supplement: emmm0006-0398-sd4.pdf [file emmm0006-0398-sd4.pdf]

### SUPPORTING INFORMATION FIGURE 3

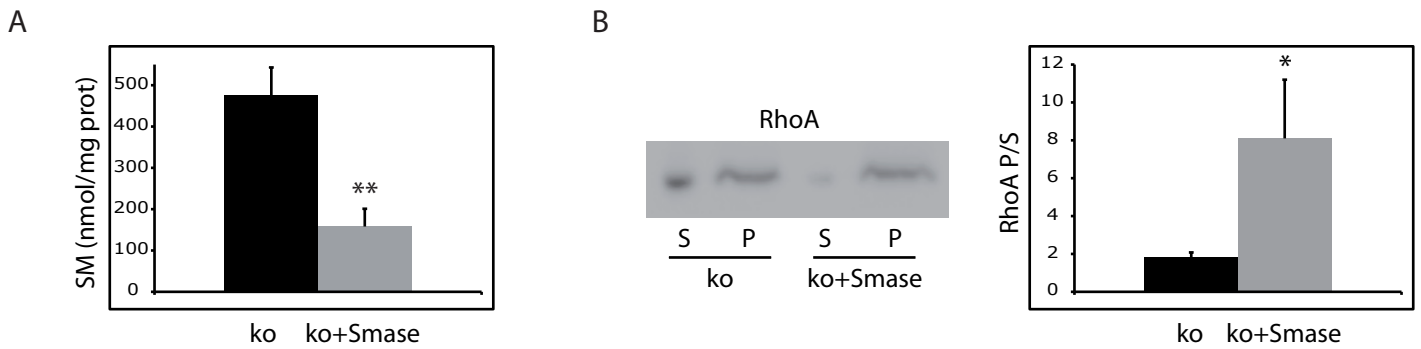

#### Supporting Information Figure 3.

##### **Sphingomyelinase treatment restores RhoA membrane binding in ASMko synaptosomes.**

A. Mean  $\pm$  SD of SM levels (nmol/mg protein) in ASMko synaptosomes treated or not with sphingomyelinase (n=3; p=0.016). B. Western blots of RhoA in supernatants (S) and pellets (P) after 100000g centrifugation of ASMko synaptosomes treated or not with sphingomyelinase. Graph shows mean  $\pm$  SD of RhoA ratio pellet/supernatant (n=3; p= 0.032).
