# Supplementary material for: Pharmacological reversion of sphingomyelin-induced dendritic spine anomalies in a Niemann Pick disease type A mouse model
Source: PubMed Central journal article supplement (PMC3958313; doi:10.1002/emmm.201302649), 2014-01-21
Supplement: emmm0006-0398-sd6.pdf [file emmm0006-0398-sd6.pdf]

**SUPPORTING INFORMATION FIGURE 5**

A

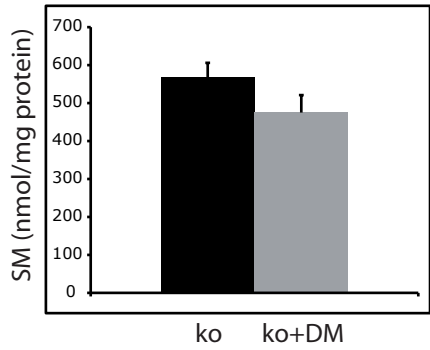

B

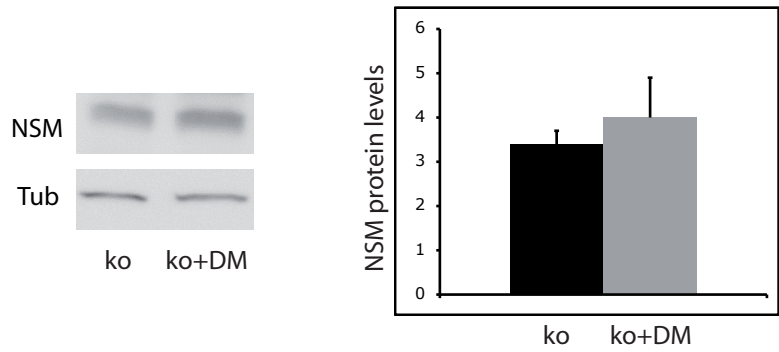

C

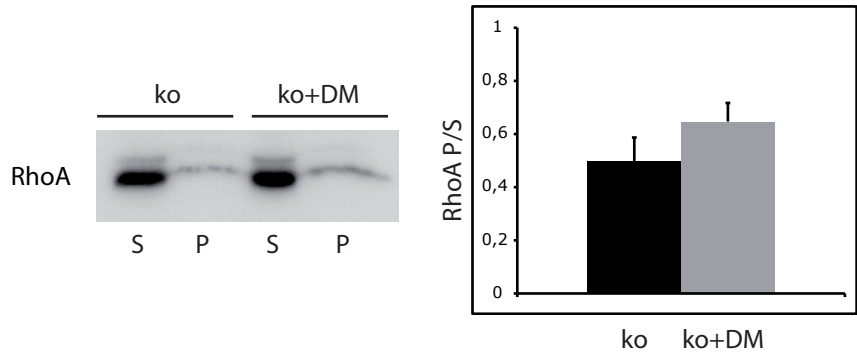

**Supporting Information Figure 5  
Dexamethasone treatment of ASMko males does not alter SM levels, NSM expression or RhoA membrane binding in synaptosomes.**

A. Mean  $\pm$  SD of SM levels (nmol/mg protein) in synaptosomes from ASMko males treated or not with dexamethasone (n=10). B. Western blot of NSM and tubulin levels in synaptosomes derived from ASMko males treated or not with dexamethasone. Graph shows mean  $\pm$  SD of NSM levels normalized to tubulin (n=10). C. Western blot of RhoA in supernatants (S) and pellets (P) after 100000g centrifugation of synaptosomes from ASMko males treated or not with dexamethasone. Graph shows mean  $\pm$  SD of the RhoA ratio pellet/supernatant (n=10).
