# Supplementary material for: Pharmacological reversion of sphingomyelin-induced dendritic spine anomalies in a Niemann Pick disease type A mouse model
Source: PubMed Central journal article supplement (PMC3958313; doi:10.1002/emmm.201302649), 2014-01-21
Supplement: emmm0006-0398-sd7.pdf [file emmm0006-0398-sd7.pdf]

## SUPPORTING INFORMATION FIGURE 6

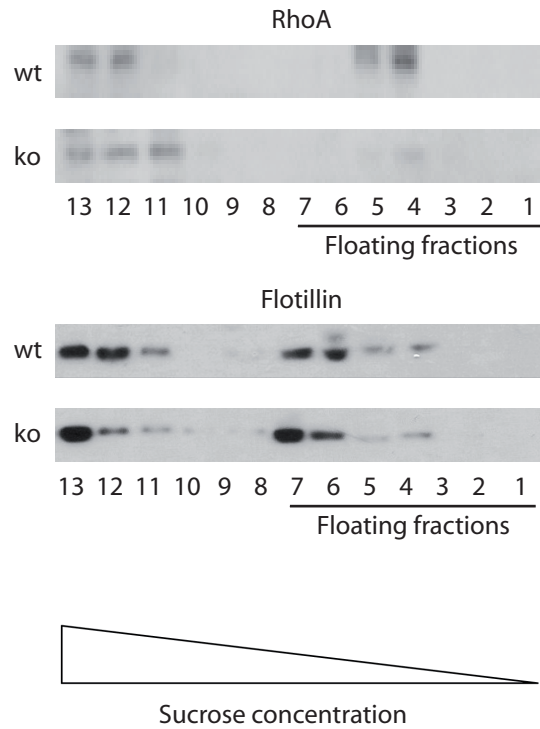

### Supporting Information Figure 6.

**RhoA distribution in rafts is altered in ASMko synaptosomes.** RhoA and Flotillin membrane partitioning analyzed by Western blot of the fractions from the sucrose gradients after cold TritonX-114 extraction of synaptosomes from wt or ASMko mice. Light (floating) fractions 1-7 correspond to rafts.
